# Supplementary material
Source: PubMed Central journal article supplement (PMC2575438)
Supplement: 0806651105_0806651105SI.pdf [file 0806651105_0806651105SI.pdf]

# Supporting Information

Loh *et al.* 10.1073/pnas.0806651105

## SI Text

**Biological Activity.** The biological activity of deposited biotin-BSA was investigated as depicted in Fig. S1 and described in the article. After biotin-BSA patterning, the substrates were immersed in solutions of streptavidin, followed by biotin-IgG. A regular increase in the lateral dimension of the patterned dots was observed (see Fig. 4), which is consistent with a monolayer of streptavidin and biotin-IgG surrounding the features and laying flat on the substrate (Fig. S1D). We hypothesize that the IgG lays flat upon drying of the substrate, which is likely a favorable conformation because of the electrostatic attraction between the positively charged IgG and negatively charged MHA. This hypothesis is supported by an observed height

increase in the biotin-BSA/streptavidin/biotin-IgG features of  $\approx 10$  nm when imaged while wet (submerged in NanoPure water) with tapping-mode AFM (Fig. S2) compared with the dry features. A height increase of this size suggests that the biotin is attached to the IgG at its 4-nm dimension. This would result in  $\approx 10$ -nm height increase when the streptavidin/biotin-IgG complex is in its native state and a much larger diameter increase (between  $\approx 18$  and 40 nm) after drying of the substrates. Thus, after drying, we believe the proteins undergo a reconfiguration from an upright configuration to a laying-sideways configuration. Note, substrates imaged while hydrated were covered with a droplet of NanoPure water and imaged in tapping mode by using a Veeco Dimension 3100 AFM with a passive liquid cell.



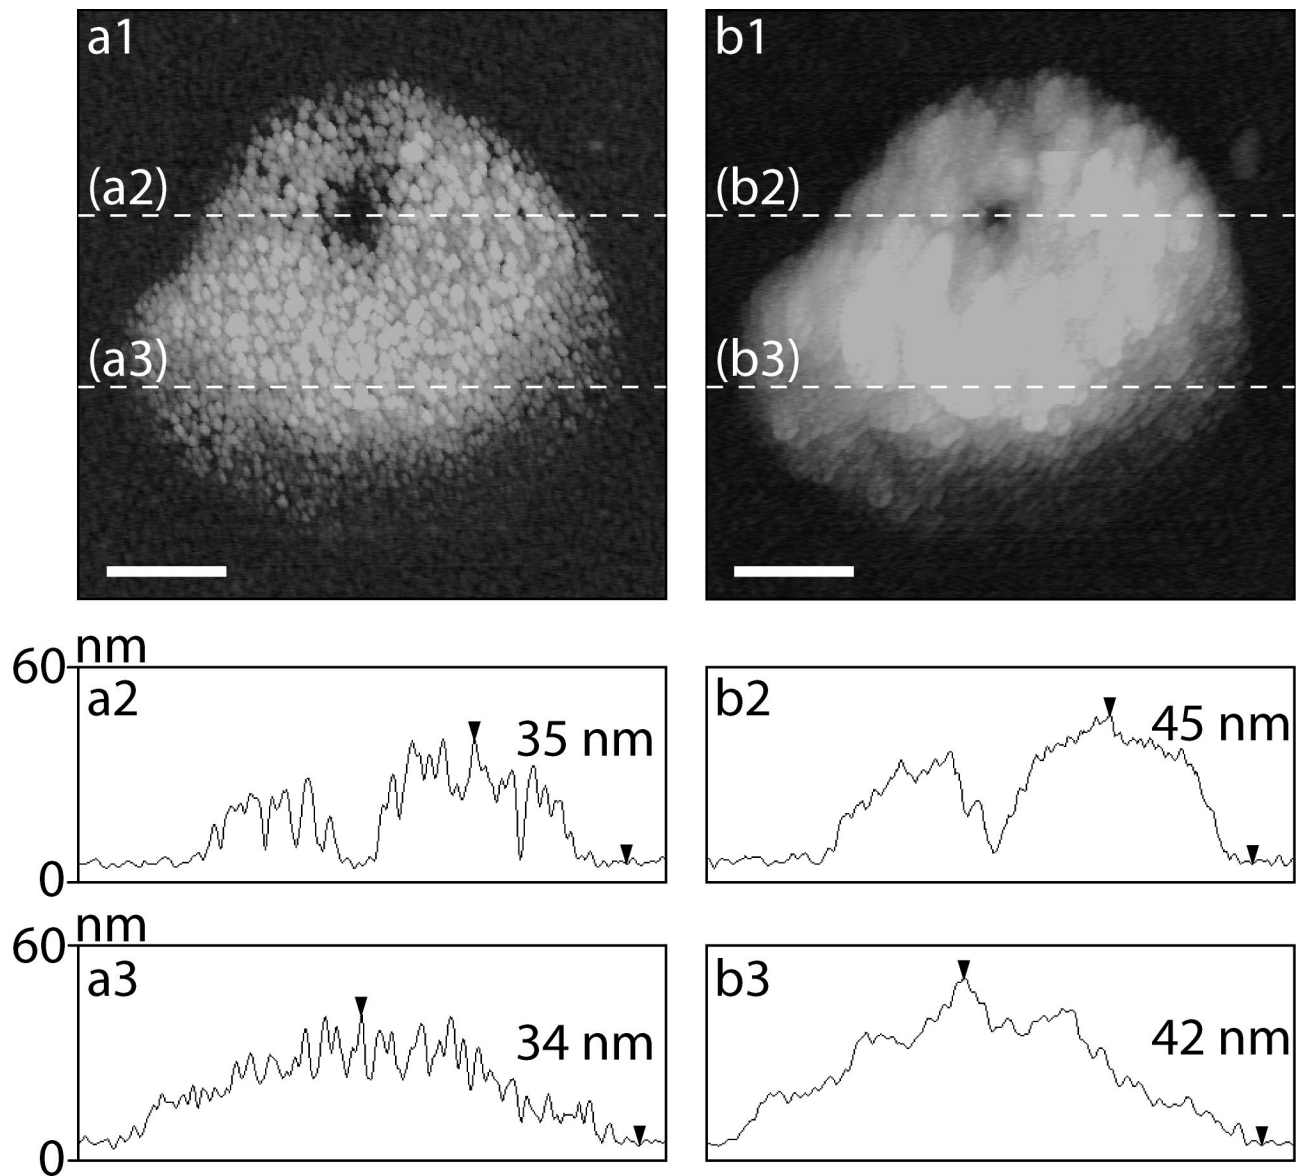

Fig. S2. Tapping-mode AFM images and height profiles of the same dot feature of biotin-BSA after immersion in streptavidin then biotin-IgG (a) in air (dry), and submerged in NanoPure water (b). (Scale bars: 500 nm). Height scale is 50 nm. There is a height increase of 8–10 nm when wet.
